# Supplementary material for: Real-world pharmacovigilance investigation of imipenem/cilastatin: signal detection using the FDA Adverse Event Reporting System (FAERS) database
Source: Front Pharmacol. 2025 Feb 13;16:1524159. doi: 10.3389/fphar.2025.1524159 (PMC11865190; doi:10.3389/fphar.2025.1524159)
Supplement: Supplementary file 1 [file Table2.xlsx]

## Sheet: PT
Preferred Term (PT)	Case Reports	ROR(95% CI)	PRR(95% CI)	χ2	IC(IC025)	EBGM(EBGM05)
Investigations
fungal test positive	3	73.38(23.52, 228.9)	73.35(23.53, 228.62)	211.93	6.18(4.76)	72.62(28.03)
antibiotic level above therapeutic	3	72.15(23.13, 225.05)	72.12(23.14, 224.78)	208.32	6.16(4.73)	71.42(27.57)
candida test positive	3	65.78(21.1, 205.05)	65.75(21.1, 204.93)	189.55	6.03(4.6)	65.16(25.16)
enterococcus test positive	3	39.95(12.84, 124.3)	39.93(12.81, 124.45)	113.25	5.31(3.89)	39.72(15.37)
oxygen saturation abnormal	11	38.28(21.15, 69.26)	38.22(21.23, 68.81)	396.58	5.25(4.43)	38.02(23.15)
procalcitonin increased	4	33.45(12.52, 89.36)	33.43(12.55, 89.07)	125.27	5.06(3.79)	33.28(14.63)
heart rate abnormal	16	26.21(16.03, 42.85)	26.15(16.02, 42.69)	385.66	4.7(4.02)	26.06(17.27)
body temperature abnormal	4	20.19(7.56, 53.88)	20.18(7.57, 53.77)	72.71	4.33(3.06)	20.12(8.85)
clostridium test positive	4	18.16(6.81, 48.47)	18.15(6.81, 48.36)	64.67	4.18(2.91)	18.11(7.97)
culture urine positive	3	17.58(5.66, 54.61)	17.58(5.64, 54.79)	46.78	4.13(2.72)	17.53(6.79)
blood chloride increased	3	16.03(5.16, 49.77)	16.02(5.14, 49.93)	42.16	4(2.58)	15.99(6.19)
blood pressure abnormal	34	15.8(11.28, 22.14)	15.73(11.27, 21.95)	467.98	3.97(3.49)	15.69(11.83)
pulse abnormal	4	14.57(5.46, 38.86)	14.56(5.46, 38.79)	50.41	3.86(2.59)	14.53(6.39)
blood creatinine decreased	5	14.27(5.93, 34.32)	14.26(5.9, 34.45)	61.52	3.83(2.67)	14.23(6.83)
staphylococcus test positive	3	11.54(3.72, 35.83)	11.54(3.7, 35.97)	28.83	3.53(2.11)	11.52(4.47)
bilirubin conjugated increased	3	11.36(3.66, 35.27)	11.36(3.64, 35.41)	28.29	3.5(2.09)	11.34(4.4)
breath sounds abnormal	5	9.26(3.85, 22.27)	9.26(3.83, 22.37)	36.78	3.21(2.05)	9.25(4.44)
Nervous system disorders
convulsions local	7	345(161.55, 736.79)	344.64(160.47, 740.19)	2288.77	8.36(7.34)	328.92(174.33)
epilepsy	544	180.64(165.31, 197.38)	165.84(153.33, 179.37)	87167.5	7.34(7.21)	162.12(150.53)
uraemic encephalopathy	5	154.37(63.63, 374.49)	154.25(63.85, 372.63)	745.31	7.24(6.07)	151.03(71.95)
irregular sleep wake rhythm disorder	3	140.09(44.68, 439.28)	140.03(44.93, 436.44)	406.2	7.1(5.67)	137.37(52.8)
neurodegenerative disorder	3	44.03(14.15, 137.03)	44.01(14.12, 137.17)	125.33	5.45(4.03)	43.75(16.92)
toxic encephalopathy	18	34.22(21.52, 54.41)	34.13(21.32, 54.63)	576.18	5.09(4.44)	33.97(23.05)
postictal state	4	32.84(12.29, 87.73)	32.82(12.32, 87.45)	122.85	5.03(3.76)	32.68(14.36)
language disorder	8	31.48(15.71, 63.07)	31.44(15.83, 62.43)	234.77	4.97(4.02)	31.31(17.5)
metabolic encephalopathy	7	20.94(9.97, 44)	20.92(9.93, 44.06)	132.41	4.38(3.38)	20.86(11.21)
cerebral atrophy	8	17.11(8.55, 34.26)	17.09(8.61, 33.94)	120.94	4.09(3.15)	17.06(9.54)
lacunar infarction	4	13.86(5.19, 36.97)	13.85(5.2, 36.9)	47.6	3.79(2.52)	13.83(6.08)
status epilepticus	17	13.45(8.35, 21.66)	13.42(8.38, 21.48)	195.07	3.74(3.08)	13.4(8.99)
petit mal epilepsy	7	12.24(5.83, 25.71)	12.23(5.81, 25.76)	72.07	3.61(2.61)	12.21(6.56)
altered state of consciousness	26	11.04(7.51, 16.23)	11(7.43, 16.28)	235.99	3.46(2.91)	10.98(7.95)
generalised tonic-clonic seizure	18	10.03(6.31, 15.94)	10.01(6.25, 16.02)	145.74	3.32(2.67)	9.99(6.78)
neurological symptom	6	9.54(4.28, 21.26)	9.53(4.27, 21.29)	45.77	3.25(2.18)	9.52(4.87)
Infections and infestations
superinfection fungal	5	631.02(252.86, 1574.72)	630.54(250.98, 1584.11)	2889.29	9.18(7.97)	579.77(269.74)
intracranial infection	3	331.91(104.29, 1056.33)	331.76(104.38, 1054.49)	945.66	8.31(6.85)	317.17(120.39)
gastrointestinal fungal infection	3	52.88(16.98, 164.68)	52.85(16.96, 164.72)	151.51	5.71(4.29)	52.48(20.28)
acinetobacter infection	6	51.57(23.1, 115.17)	51.53(23.07, 115.1)	295.18	5.68(4.6)	51.17(26.13)
pathogen resistance	49	46.97(35.43, 62.27)	46.63(35.44, 61.35)	2174.03	5.53(5.13)	46.33(36.6)
respiratory tract infection fungal	3	46.2(14.84, 143.8)	46.18(14.82, 143.93)	131.75	5.52(4.1)	45.89(17.75)
pseudomembranous colitis	11	42.08(23.25, 76.16)	42.01(23.33, 75.63)	437.87	5.38(4.56)	41.78(25.43)
superinfection	5	29.58(12.28, 71.22)	29.56(12.24, 71.41)	137.39	4.88(3.72)	29.44(14.11)
stenotrophomonas infection	4	28.71(10.75, 76.67)	28.7(10.77, 76.47)	106.5	4.84(3.57)	28.59(12.57)
klebsiella infection	9	16.62(8.64, 31.99)	16.6(8.69, 31.7)	131.66	4.05(3.15)	16.56(9.58)
systemic candida	4	15.67(5.87, 41.81)	15.66(5.88, 41.73)	54.78	3.97(2.7)	15.63(6.88)
pneumonia klebsiella	3	14.79(4.76, 45.91)	14.78(4.74, 46.07)	38.47	3.88(2.47)	14.75(5.72)
abdominal infection	4	13.98(5.24, 37.29)	13.97(5.24, 37.22)	48.08	3.8(2.54)	13.95(6.14)
enterococcal infection	6	11.46(5.15, 25.55)	11.46(5.13, 25.6)	57.17	3.52(2.45)	11.44(5.85)
clostridium difficile colitis	13	10.78(6.25, 18.59)	10.76(6.22, 18.63)	114.96	3.43(2.67)	10.75(6.81)
Psychiatric disorders
disorganised speech	69	421.54(330.3, 537.98)	417.15(329.72, 527.76)	27074.8	8.62(8.27)	394.32(321.52)
dysphoria	70	116.9(92.2, 148.22)	115.67(91.43, 146.34)	7832.37	6.83(6.49)	113.86(93.35)
delirium	263	72.31(63.88, 81.85)	69.47(61.76, 78.14)	17588.1	6.1(5.93)	68.81(62.04)
tic	25	39.98(26.96, 59.27)	39.83(26.91, 58.95)	941.21	5.31(4.75)	39.61(28.49)
persecutory delusion	9	32.52(16.89, 62.62)	32.48(17.01, 62.02)	273.35	5.02(4.12)	32.34(18.69)
illusion	4	21.22(7.95, 56.63)	21.2(7.96, 56.49)	76.78	4.4(3.13)	21.14(9.3)
logorrhoea	7	16.8(8, 35.29)	16.78(7.97, 35.34)	103.67	4.07(3.06)	16.75(9)
staring	4	14.3(5.36, 38.15)	14.29(5.36, 38.08)	49.35	3.83(2.57)	14.26(6.28)
psychotic symptom	3	14.24(4.59, 44.21)	14.23(4.57, 44.35)	36.84	3.83(2.41)	14.21(5.51)
mental disorder	68	13.68(10.77, 17.38)	13.55(10.71, 17.14)	789.55	3.76(3.42)	13.53(11.07)
communication disorder	5	11.4(4.74, 27.43)	11.4(4.72, 27.54)	47.34	3.51(2.35)	11.38(5.46)
listless	4	10.33(3.87, 27.54)	10.32(3.87, 27.5)	33.62	3.37(2.1)	10.31(4.54)
mania	18	9.63(6.06, 15.3)	9.6(6, 15.37)	138.62	3.26(2.61)	9.59(6.51)
psychiatric symptom	8	9.25(4.62, 18.51)	9.24(4.65, 18.35)	58.71	3.21(2.26)	9.23(5.16)
Skin and subcutaneous tissue disorders
dermatitis exfoliative generalised	13	39.5(22.89, 68.17)	39.43(22.78, 68.26)	484.27	5.29(4.53)	39.22(24.84)
henoch-schonlein purpura	8	35.85(17.89, 71.84)	35.81(18.03, 71.11)	269.35	5.16(4.21)	35.63(19.92)
linear iga disease	6	32.09(14.39, 71.59)	32.07(14.36, 71.63)	179.79	5(3.92)	31.93(16.32)
drug eruption	49	25.64(19.35, 33.97)	25.46(19.35, 33.5)	1147.5	4.66(4.26)	25.37(20.04)
acute generalised exanthematous pustulosis	14	15.95(9.44, 26.97)	15.92(9.38, 27.03)	195.4	3.99(3.26)	15.89(10.24)
drug reaction with eosinophilia and systemic symptoms	43	15.48(11.46, 20.9)	15.38(11.46, 20.64)	577.25	3.94(3.51)	15.35(11.94)
toxic skin eruption	17	14.95(9.28, 24.07)	14.91(9.32, 23.87)	220.19	3.9(3.23)	14.88(9.99)
rash morbilliform	4	12.94(4.85, 34.52)	12.93(4.85, 34.45)	43.97	3.69(2.42)	12.91(5.68)
dermatitis exfoliative	7	11.41(5.43, 23.95)	11.4(5.41, 24.01)	66.29	3.51(2.51)	11.38(6.12)
dermatitis bullous	8	9.91(4.95, 19.84)	9.9(4.99, 19.66)	63.95	3.31(2.36)	9.89(5.53)
cutaneous vasculitis	3	9.9(3.19, 30.72)	9.89(3.17, 30.82)	23.95	3.3(1.89)	9.88(3.83)
toxic epidermal necrolysis	16	9.57(5.86, 15.64)	9.55(5.85, 15.59)	122.39	3.25(2.57)	9.54(6.33)
Respiratory, thoracic and mediastinal disorders
eosinophilic pneumonia acute	3	38.05(12.23, 118.36)	38.03(12.2, 118.53)	107.61	5.24(3.82)	37.84(14.64)
hyperventilation	9	13.29(6.91, 25.57)	13.28(6.95, 25.36)	101.98	3.73(2.83)	13.25(7.67)
tachypnoea	14	9.43(5.58, 15.93)	9.41(5.54, 15.97)	105.08	3.23(2.5)	9.4(6.06)
Injury, poisoning and procedural complications
labelled drug-drug interaction issue	4	47.16(17.64, 126.11)	47.14(17.69, 125.6)	179.45	5.55(4.28)	46.84(20.57)
product preparation issue	12	22.84(12.95, 40.27)	22.8(12.91, 40.25)	249.3	4.51(3.72)	22.73(14.14)
incorrect dosage administered	9	16.18(8.41, 31.13)	16.16(8.46, 30.86)	127.7	4.01(3.12)	16.12(9.32)
Hepatobiliary disorders
drug-induced liver injury	35	11.73(8.41, 16.36)	11.67(8.36, 16.28)	341.17	3.54(3.07)	11.66(8.83)
mixed liver injury	3	11.52(3.71, 35.76)	11.51(3.69, 35.87)	28.76	3.52(2.11)	11.5(4.46)
liver injury	21	9.31(6.07, 14.3)	9.29(6.04, 14.3)	155.14	3.21(2.61)	9.28(6.48)
General disorders and administration site conditions
foaming at mouth	10	43.45(23.32, 80.93)	43.38(23.17, 81.22)	411.57	5.43(4.57)	43.13(25.63)
hyperpyrexia	12	29.33(16.63, 51.73)	29.28(16.59, 51.69)	326.46	4.87(4.08)	29.17(18.14)
multiple-drug resistance	4	12.68(4.76, 33.84)	12.68(4.76, 33.79)	42.95	3.66(2.4)	12.66(5.57)
Eye disorders
halo vision	6	44.97(20.14, 100.38)	44.93(20.12, 100.35)	256.1	5.48(4.41)	44.65(22.81)
gaze palsy	8	41.12(20.52, 82.43)	41.08(20.69, 81.57)	311.03	5.35(4.41)	40.85(22.83)
pupillary reflex impaired	5	24.86(10.33, 59.83)	24.84(10.28, 60.01)	114	4.63(3.47)	24.76(11.87)
Musculoskeletal and connective tissue disorders
trismus	22	37.73(24.8, 57.4)	37.61(24.92, 56.76)	779.94	5.23(4.63)	37.42(26.34)
muscle twitching	84	31.64(25.5, 39.26)	31.25(25.19, 38.77)	2450.03	4.96(4.65)	31.12(25.98)
Metabolism and nutrition disorders
metabolic alkalosis	5	28.48(11.83, 68.56)	28.46(11.78, 68.75)	131.94	4.83(3.67)	28.35(13.59)
cell death	5	22.26(9.25, 53.56)	22.24(9.21, 53.73)	101.12	4.47(3.31)	22.18(10.63)
Immune system disorders
cross sensitivity reaction	3	48.7(15.64, 151.62)	48.68(15.62, 151.72)	139.16	5.6(4.18)	48.36(18.7)
anaphylactoid reaction	6	13.12(5.89, 29.24)	13.11(5.87, 29.28)	67	3.71(2.64)	13.09(6.69)
Gastrointestinal disorders
dysbiosis	19	302.36(190.95, 478.78)	301.49(192.08, 473.21)	5461.4	8.18(7.53)	289.4(197)
enterocolitis haemorrhagic	3	16.82(5.41, 52.22)	16.81(5.39, 52.39)	44.5	4.07(2.65)	16.77(6.5)
Blood and lymphatic system disorders
eosinophilia	22	11.48(7.55, 17.45)	11.44(7.58, 17.27)	209.41	3.51(2.92)	11.43(8.05)
immune thrombocytopenia	4	10.38(3.89, 27.69)	10.38(3.9, 27.66)	33.84	3.37(2.11)	10.36(4.56)
Ear and labyrinth disorders
ototoxicity	4	19.41(7.27, 51.81)	19.4(7.28, 51.69)	69.63	4.27(3.01)	19.35(8.51)
